# Supplementary material for: High-performance lithium storage of Ti3+-doped anatase TiO2@C composite spheres
Source: Royal Society of Chemistry journal article supplement (doi:10.1039/c6ra22105j), 2016-01-01
Supplement: c6ra22105j1.pdf [file c6ra22105j1.pdf]

1 **Supporting Information for**

2

3 **High-performance lithium storage of Ti<sup>3+</sup>-doped anatase**

4 **TiO<sub>2</sub>@C composite spheres**

5 Xiaoying Chen, Li Liu\*, Linguag Yi, Guoxiong Guo, Min Li, Jianjun Xie, Yan Ouyang, Xianyou

6 Wang

7

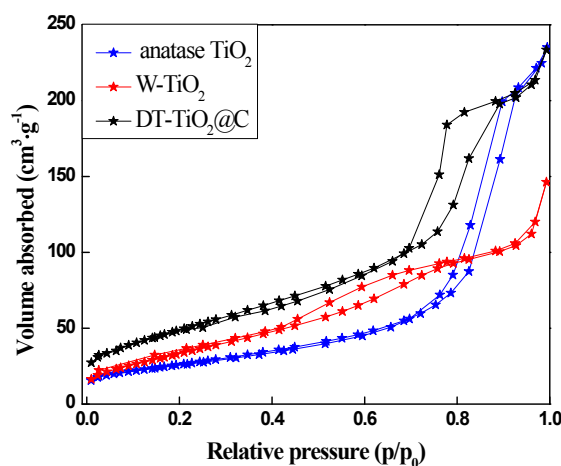

8

9 **Fig. S1.** Nitrogen adsorption-desorption isotherms of anatase TiO<sub>2</sub>, W-TiO<sub>2</sub> and TD-TiO<sub>2</sub>@C

10

11

---

\* Corresponding author. Tel.: +86-731-58292206; Fax: +86-731-58292477

E-mail addresses: [liulili1203@126.com](mailto:liulili1203@126.com) (L. Liu)

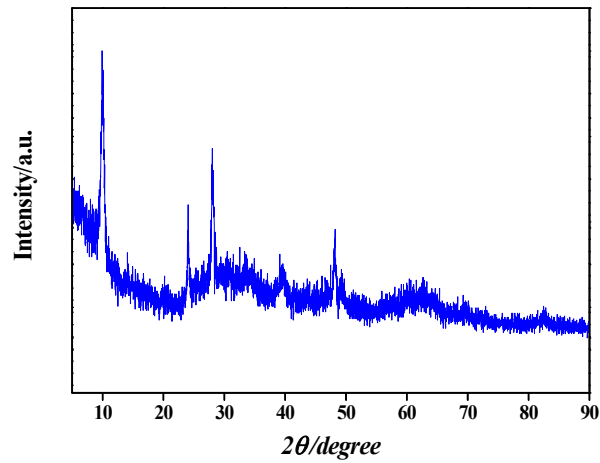

12

13 **Fig. S2.** XRD patterns of titanium glycerolate

14 The intermediated powders titanium glycerolate show a sharp peak at  $2\theta = \text{ca.}$   
15  $10^\circ$ . Although the pattern cannot be indexed to any known structure in database, some  
16 studies refer to it as titanium glycerolate (TiGly).<sup>1</sup>

17

## 18 **References**

19 [1] G. Zakharova, E. Andreikov, V. Osipova, Yu. G. Yatluk, I. Puzyrev, *Inorg. Mater.*, 2013, **49**,  
20 1127.

21

22
